# Supplementary material
Source: PubMed Central journal article supplement (PMC7655313)
Supplement: 17-00436.pdf [file 17-00436.pdf]

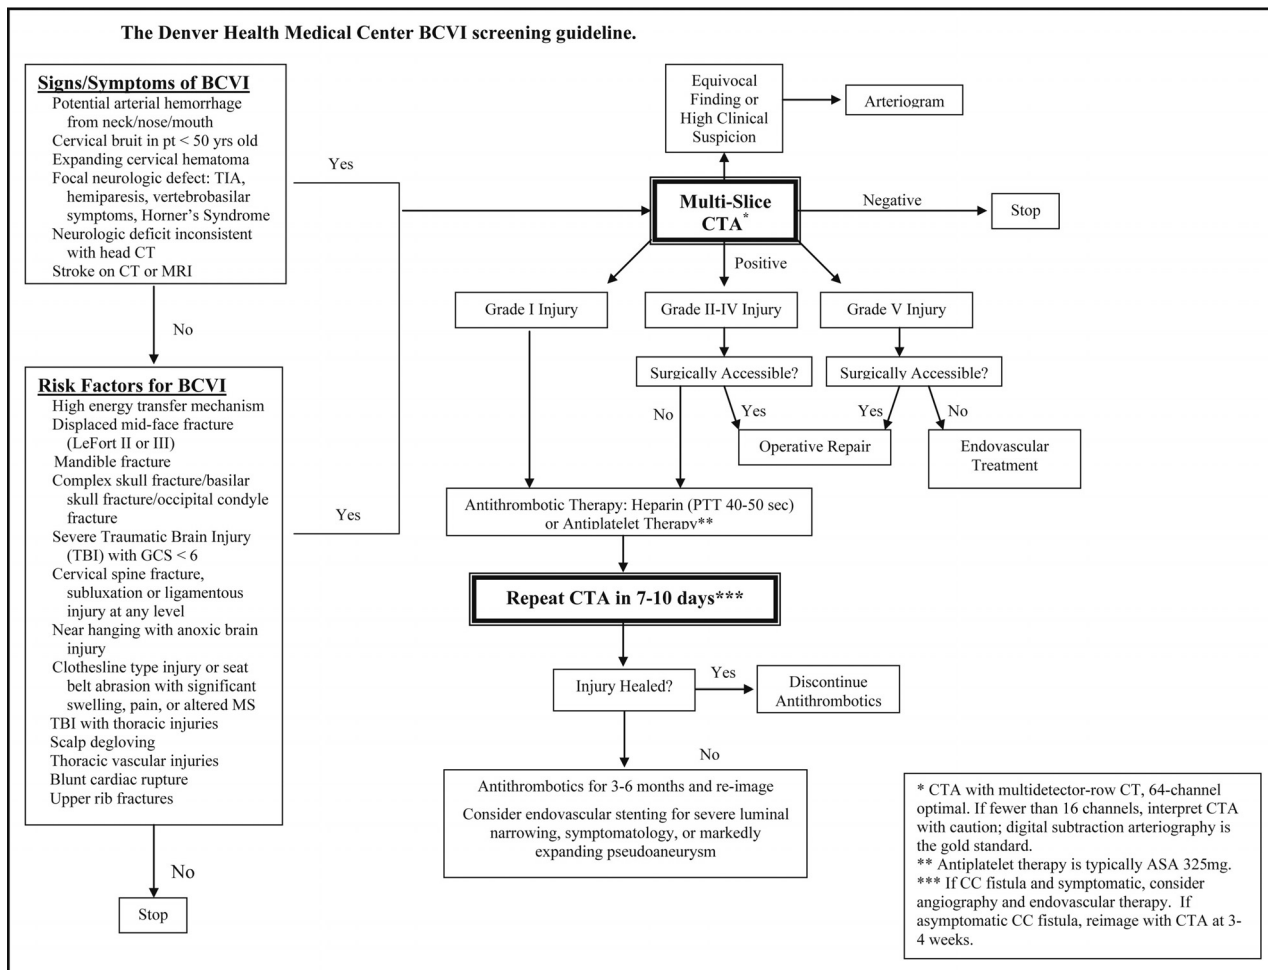

**ON-LINE FIGURE.** Latest BCVI screening and management guideline<sup>4</sup> as suggested by Denver Health Medical Center group. Reprinted from: Geddes AE, Burlew CC, Wagenaar AE, et al. Expanded screening criteria for blunt cerebrovascular injury: a bigger impact than anticipated. *Am J Surg* 2016;212:1167-74, with permission from Elsevier.

**On-line Table 1: Neck CT angiography protocol for BCVI screening at our institution**

| Protocol                        |                                                                                                      |
|---------------------------------|------------------------------------------------------------------------------------------------------|
| Scan range                      | Aortic arch to the skull base (aortic arch to circle of Willis)                                      |
| Scan parameters                 | 120 kV and automated milliampere                                                                     |
| Contrast                        | Iopamidol 370 <sup>a</sup>                                                                           |
| Contrast dose (depends on eGFR) | 100 mL (eGFR > 60)<br>75 mL (eGFR > 30 ≤ 60)                                                         |
| Injection rate                  | Followed by 40-mL saline at 4 mL/s                                                                   |
| Section thickness               | 4 mL/s through 18- to 20-ga cannula<br>3 mm (overlap of 2.5 mm) and 1 × 0.7, sent to 3D workstations |

**Note:**—eGFR indicates estimated glomerular filtration rate.

<sup>a</sup>Imeron (Bracco, Milan, Italy).

**On-line Table 2: Neck MR angiography protocol for BCVI screening at our institution**

| Protocol                |                                                                                                                                                                        |
|-------------------------|------------------------------------------------------------------------------------------------------------------------------------------------------------------------|
| Position and scan range | Supine, aortic arch to the circle of Willis                                                                                                                            |
| Contrast                | Gadavist <sup>a</sup>                                                                                                                                                  |
| Contrast dose           | 0.1 mL/kg (or 0.1 mmol/kg) intravenous                                                                                                                                 |
| Technique               | Axial T1 fat-saturated<br>Axial T2<br>Axial 2D time-of-flight MRA<br>3D MRA using a 3D gradient-echo pulse sequence with fat suppression (also sent to 3D workstation) |
| Injection rate          | 1.5–2 mL/s                                                                                                                                                             |
| Saline bolus            | 10 mL at 2 mL/s                                                                                                                                                        |

<sup>a</sup>Gadobutrol (Bayer Schering Pharma, Berlin, Germany).
